# Supplementary material for: Incessant formation of chain-like mesoporous silica with a superior binding capacity for mercury
Source: Royal Society of Chemistry journal article supplement (doi:10.1039/c3dt53348d), 2014-01-01
Supplement: c3dt53348d.pdf [file c3dt53348d.pdf]

## Supporting information

Fluorocarbon templated mesoporous material IBN-4<sup>22</sup> was synthesized and its N<sub>2</sub> adsorption isotherm is displayed below,

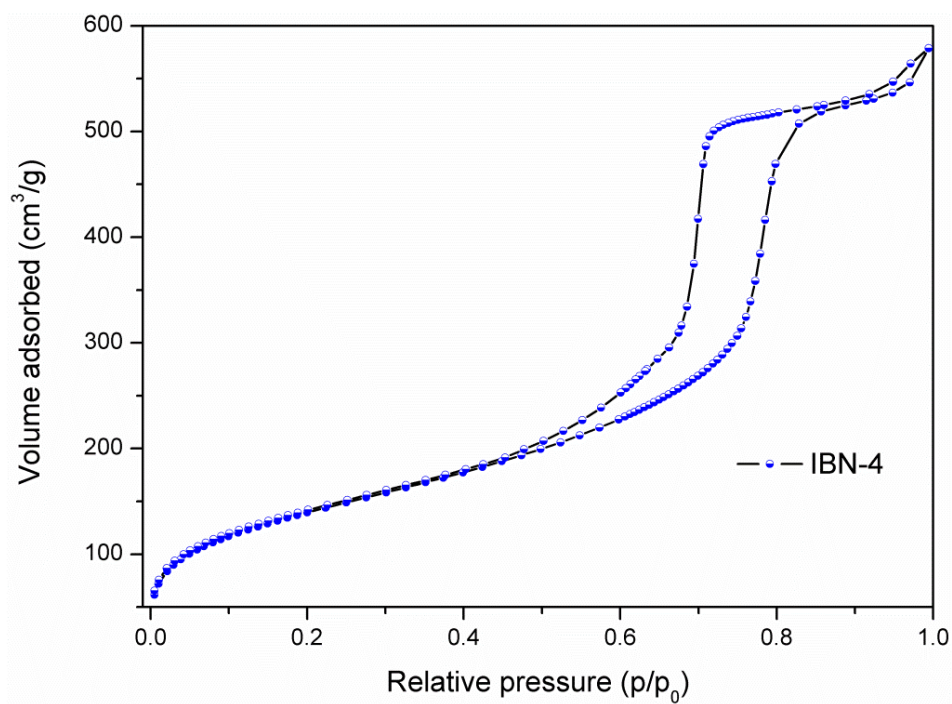

**Figure S1:** N<sub>2</sub> adsorption desorption isotherm of IBN-4.

FT-IR spectra were measured for the IBN-4 and ICMS materials. The methylene stretching frequencies were observed near the region of  $2930\text{ cm}^{-1}$  was found to increase with increasing amount of thiol groups.

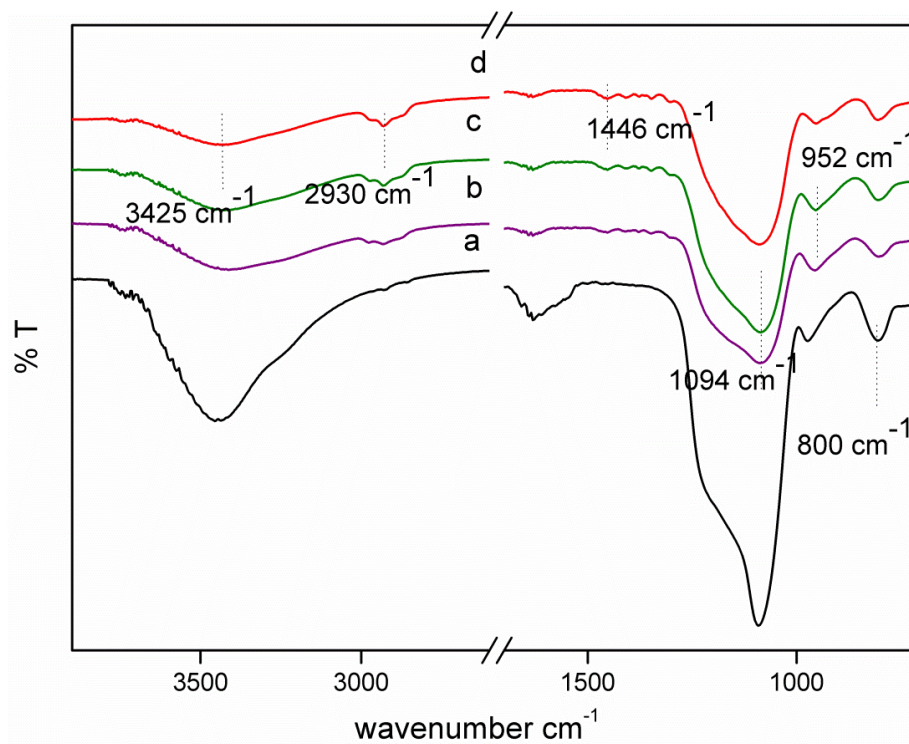

**Figure S2:** FTIR spectra of IBN-4 and ICMS materials, (a) IBN, (b) ICMS-10, (c) ICMS-20 and (d) ICMS-30.

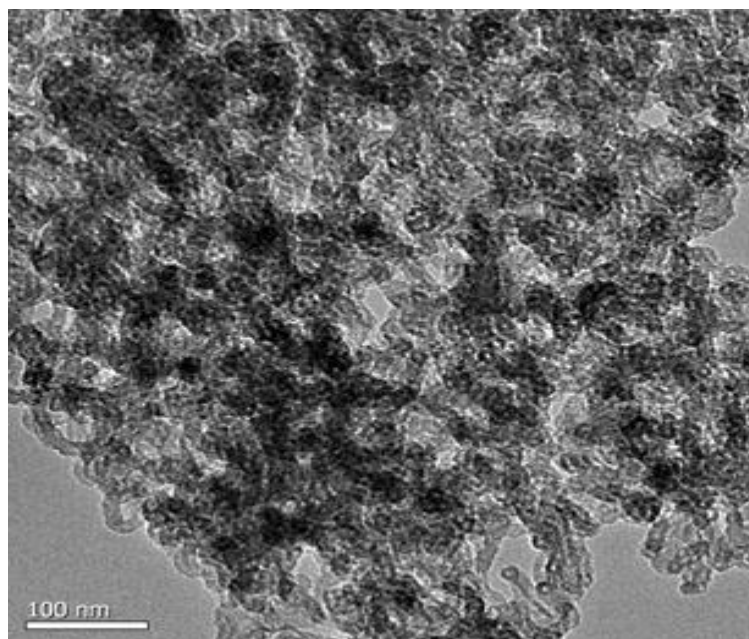

**Figure S3:** TEM image of ICMS-40 materials showing highly clustered with blocked pore channels.

**Table S1:** Elemental analysis

|         | C %   | H %  | S %  |
|---------|-------|------|------|
| ICMS-10 | 14.01 | 2.75 | 4.09 |
| ICMS-20 | 16.11 | 3.06 | 6.27 |
| ICMS-30 | 20.28 | 3.78 | 9.22 |

The weight percentages of Carbon, Hydrogen and Sulphur elements in the ICMS materials are given in the table.
